# Supplementary material
Source: bioRxiv or medRxiv preprint supplement (https://medrxiv.org/highwire/filestream/74266/field_highwire_adjunct_files/0/2020.03.24.20042747-1.pdf)
Supplement: Supplementary file [file 2020.03.24.20042747-1.pdf]

|             | Jan | Feb | Mar | Apr | May | Jun | July | Aug | Total | Ttotals |       |
|-------------|-----|-----|-----|-----|-----|-----|------|-----|-------|---------|-------|
| <b>2019</b> |     |     |     |     |     |     |      |     |       |         |       |
| Male        | 4   | 1   | 3   | 2   | 4   | 5   | 12   | 8   | 39    |         |       |
|             | 75  | 40  | 77  | 52  | 42  | 45  | 90   | 47  | 468   | Total   | 813   |
| Female      | 3   | 0   | 1   | 0   | 3   | 1   | 8    | 6   | 22    |         |       |
|             | 63  | 22  | 24  | 41  | 39  | 36  | 81   | 39  | 345   |         |       |
| Total case  | 7   | 1   | 4   | 2   | 7   | 6   | 20   | 14  | 61    |         |       |
| TTotal      | 138 | 62  | 101 | 93  | 81  | 81  | 171  | 86  | 813   |         |       |
| P.f         | 1   | 0   | 0   | 0   | 3   | 1   | 8    | 1   | 14    |         |       |
| P.v         | 6   | 1   | 4   | 2   | 5   | 5   | 12   | 13  | 48    |         |       |
| Mixed       |     |     |     |     | 1   |     |      |     | 1     |         |       |
| Total       | 7   | 1   | 4   | 2   | 9   | 6   | 20   | 14  | 63    |         |       |
| <5          | 0   | 0   | 0   | 0   | 2   | 1   | 4    | 1   | 8     |         |       |
|             | 32  | 27  | 29  | 16  | 18  | 18  | 23   | 19  | 182   |         |       |
| 6-15        | 2   | 0   | 1   | 2   | 1   | 0   | 4    | 6   | 16    |         | check |
|             | 39  | 12  | 16  | 25  | 16  | 13  | 37   | 18  | 176   | Total   | 813   |
| >15         | 5   | 1   | 3   | 0   | 4   | 5   | 12   | 7   | 37    |         |       |
|             | 67  | 23  | 56  | 52  | 47  | 50  | 111  | 49  | 455   |         |       |
| Total       | 7   | 1   | 4   | 2   | 7   | 6   | 20   | 14  | 61    |         |       |
| TTotal      | 138 | 62  | 101 | 93  | 81  | 81  | 171  | 86  | 813   |         |       |
| 01          | 2   | 1   | 2   | 1   | 3   | 2   | 8    | 4   | 23    |         |       |
| 02          |     |     | 1   | 1   | 2   | 1   | 5    | 1   | 11    |         |       |
| Meo         | 2   |     | 1   |     | 1   | 1   | 2    | 7   | 14    |         | Total |
| Apollo      | 1   |     |     |     | 1   |     | 3    | 1   | 6     |         | 61    |
| Beyan       | 1   |     |     |     |     |     | 1    | 1   | 3     |         |       |
| Dket        |     |     |     |     |     |     | 1    |     | 1     |         |       |
| Agrae       |     |     |     |     |     | 1   |      |     | 1     |         |       |
| Maret       | 1   |     |     |     |     | 1   |      |     | 2     |         |       |
| Total       | 7   | 1   | 4   | 2   | 7   | 6   | 20   | 14  | 61    |         |       |

|                    | Jan | feb | mar | apr | may | Jun | July | aug | Sep | Oct | nov | dec | total |       |
|--------------------|-----|-----|-----|-----|-----|-----|------|-----|-----|-----|-----|-----|-------|-------|
| 2018               |     |     |     |     |     |     |      |     |     |     |     |     |       |       |
| Male               | 11  | 4   | 1   | 5   | 4   | 25  | 21   | 21  | 22  | 23  | 11  | 19  | 167   |       |
|                    | 50  | 27  | 57  | 26  | 34  | 62  | 53   | 86  | 86  | 69  | 52  | 70  | 672   | Total |
| Female             | 3   | 5   | 2   | 4   | 5   | 13  | 16   | 11  | 14  | 18  | 5   | 21  | 117   | 1330  |
|                    | 32  | 28  | 46  | 42  | 40  | 49  | 73   | 70  | 90  | 63  | 54  | 71  | 658   |       |
| <b>Total cases</b> | 14  | 9   | 3   | 9   | 9   | 38  | 37   | 32  | 36  | 41  | 16  | 40  | 284   |       |
| <b>TTotal</b>      | 82  | 55  | 103 | 68  | 74  | 111 | 126  | 156 | 176 | 132 | 106 | 141 | 1330  |       |
| P.f                | 3   | 6   | 0   | 6   | 1   | 3   | 2    | 7   | 8   | 2   | 1   | 1   | 40    |       |
| P.v                | 11  | 3   | 5   | 3   | 8   | 35  | 35   | 25  | 28  | 39  | 15  | 39  | 246   |       |
| Mixed              |     |     |     |     |     |     |      | 1   | 1   |     |     |     | 2     |       |
| <b>Total</b>       | 14  | 9   | 5   | 9   | 9   | 38  | 37   | 32  | 36  | 41  | 16  | 40  | 288   |       |
| <5                 | 1   | 1   | 1   | 6   | 3   | 4   | 5    | 5   | 6   | 7   | 4   | 4   | 47    | Check |
|                    | 19  | 15  | 28  | 27  | 33  | 21  | 41   | 38  | 57  | 28  | 30  | 25  | 362   | Total |
| 6-15               | 3   | 4   | 1   | 0   | 1   | 8   | 13   | 5   | 9   | 7   | 4   | 12  | 67    | 1330  |
|                    | 18  | 10  | 23  | 18  | 16  | 23  | 50   | 34  | 26  | 20  | 17  | 45  | 300   |       |
| >15                | 10  | 4   | 1   | 3   | 5   | 26  | 19   | 22  | 21  | 27  | 8   | 24  | 170   |       |
|                    | 45  | 30  | 52  | 23  | 25  | 67  | 35   | 84  | 93  | 84  | 59  | 71  | 668   |       |
| <b>Total</b>       | 14  | 9   | 3   | 9   | 9   | 38  | 37   | 32  | 36  | 41  | 16  | 40  | 284   |       |
| <b>TTotal</b>      | 82  | 55  | 103 | 68  | 74  | 111 | 126  | 156 | 176 | 132 | 106 | 141 | 1330  |       |
|                    |     |     |     |     |     |     |      |     |     |     |     |     |       |       |
| 01                 | 5   | 7   | 2   | 4   | 6   | 18  | 17   | 13  | 11  | 14  | 4   | 13  | 114   |       |
| 02                 | 5   | 2   | 1   | 1   | 0   | 12  | 7    | 5   | 11  | 8   | 3   | 2   | 57    |       |
| Meo                | 1   | 0   | 0   | 2   | 3   | 2   | 7    | 7   | 6   | 10  | 3   | 7   | 48    |       |
| Apollo             | 0   | 0   | 0   | 0   | 0   | 2   | 1    | 1   | 3   | 1   | 1   | 3   | 12    |       |
| Beyan              | 1   | 0   | 0   | 0   | 0   | 0   | 2    | 0   | 0   | 2   | 2   | 1   | 8     |       |
| Agrae              | 0   | 0   | 0   | 0   | 0   | 2   | 0    | 1   | 0   | 1   | 0   | 1   | 5     |       |
| Rora               | 1   | 0   | 0   | 0   | 0   | 0   | 0    | 1   | 1   | 1   | 0   | 2   | 6     | Check |
| Dket               | 0   | 0   | 0   | 1   | 0   | 0   | 0    | 0   | 1   | 1   | 0   | 3   | 6     | Total |
| Adobha             | 0   | 0   | 0   | 0   | 0   | 0   | 0    | 1   | 0   | 0   | 0   | 1   | 2     | 284   |
| Maret              |     |     |     |     |     |     | 2    | 0   | 1   |     |     | 2   | 5     |       |
| Felket             | 1   |     |     |     |     |     | 1    | 1   |     | 1   | 1   | 1   | 6     |       |
| Hday               |     |     |     | 1   |     | 2   |      | 2   | 2   | 2   | 2   | 4   | 15    |       |
| <b>Total</b>       | 14  | 9   | 3   | 9   | 9   | 38  | 37   | 32  | 36  | 41  | 16  | 40  | 284   |       |

|                    | Jan        | feb        | mar        | Apr        | May        | Jun       | July       | Aug        | Sep        | Oct        | Nov        | Dec        | Total       |              |
|--------------------|------------|------------|------------|------------|------------|-----------|------------|------------|------------|------------|------------|------------|-------------|--------------|
| 2017               |            |            |            |            |            |           |            |            |            |            |            |            |             |              |
| Male               | 140        | 14         | 28         | 15         | 16         | 14        | 150        | 89         | 42         | 36         | 49         | 29         | 622         |              |
|                    | 251        | 89         | 112        | 80         | 58         | 41        | 247        | 133        | 78         | 116        | 151        | 102        | 1458        | Total        |
| Female             | 83         | 8          | 16         | 14         | 20         | 9         | 128        | 53         | 38         | 35         | 38         | 23         | 465         | 2680         |
|                    | 212        | 53         | 102        | 54         | 74         | 32        | 201        | 114        | 92         | 40         | 126        | 122        | 1222        |              |
| <b>Total cases</b> | <b>223</b> | <b>22</b>  | <b>44</b>  | <b>29</b>  | <b>36</b>  | <b>23</b> | <b>278</b> | <b>142</b> | <b>80</b>  | <b>71</b>  | <b>87</b>  | <b>52</b>  | <b>1087</b> |              |
| <b>TTTotal</b>     | <b>463</b> | <b>142</b> | <b>214</b> | <b>134</b> | <b>132</b> | <b>73</b> | <b>448</b> | <b>247</b> | <b>170</b> | <b>156</b> | <b>277</b> | <b>224</b> | <b>2680</b> |              |
| P.f                | 62         | 5          | 16         | 9          | 9          | 8         | 46         | 49         | 27         | 13         | 10         | 2          | 256         |              |
| P.v                | 163        | 17         | 28         | 20         | 27         | 15        | 233        | 96         | 54         | 58         | 77         | 50         | 838         |              |
| mixed              | 2          |            |            |            |            |           | 1          | 3          | 1          |            |            |            | 7           |              |
| <b>Total</b>       | <b>227</b> | <b>22</b>  | <b>44</b>  | <b>29</b>  | <b>36</b>  | <b>23</b> | <b>280</b> | <b>148</b> | <b>82</b>  | <b>71</b>  | <b>87</b>  | <b>52</b>  | <b>1101</b> | <b>Total</b> |
| <5                 | 56         | 2          | 7          | 14         | 1          | 0         | 53         | 47         | 25         | 9          | 9          | 6          | 229         | total        |
|                    | 87         | 38         | 50         | 33         | 15         | 22        | 78         | 52         | 47         | 34         | 60         | 53         | 569         | 1087         |
| 6-15               | 49         | 4          | 10         | 3          | 15         | 4         | 36         | 49         | 17         | 25         | 35         | 22         | 269         |              |
|                    | 121        | 26         | 50         | 37         | 36         | 20        | 101        | 62         | 25         | 23         | 69         | 71         | 641         | TTTotal      |
| >15                | 118        | 16         | 27         | 12         | 20         | 19        | 189        | 46         | 38         | 37         | 43         | 24         | 589         | 2905         |
|                    | 255        | 78         | 114        | 64         | 81         | 31        | 269        | 133        | 98         | 99         | 148        | 100        | 1470        |              |
| <b>Total Cases</b> | <b>223</b> | <b>22</b>  | <b>44</b>  | <b>29</b>  | <b>36</b>  | <b>23</b> | <b>278</b> | <b>142</b> | <b>80</b>  | <b>71</b>  | <b>87</b>  | <b>52</b>  | <b>1087</b> |              |
| <b>TTTotal</b>     | <b>463</b> | <b>142</b> | <b>214</b> | <b>134</b> | <b>132</b> | <b>73</b> | <b>448</b> | <b>247</b> | <b>170</b> | <b>156</b> | <b>277</b> | <b>224</b> | <b>2680</b> |              |
| <b>01</b>          | 128        | 10         | 20         | 17         | 28         | 14        | 161        | 41         | 20         | 36         | 51         | 20         | 546         |              |
| <b>02</b>          | 45         | 4          | 15         | 3          | 2          | 2         | 26         | 24         | 16         | 10         | 10         | 8          | 165         |              |
| <b>Meo</b>         | 24         | 2          | 3          | 8          | 4          | 4         | 58         | 32         | 21         | 16         | 18         | 15         | 205         |              |
| <b>Apollo</b>      | 5          | 1          | 1          | 0          | 0          | 0         | 2          | 8          | 3          | 1          | 3          | 1          | 25          | Check        |
| <b>Beyan</b>       | 1          | 0          | 2          | 0          | 0          | 1         | 1          | 1          | 4          | 2          | 0          | 1          | 13          | Total        |
| <b>Dket</b>        | 4          | 1          | 2          | 0          | 2          | 0         | 2          | 2          | 2          | 2          | 0          | 1          | 18          | 1087         |
| <b>Agrae</b>       | 2          | 0          | 0          | 0          | 0          | 0         | 2          | 5          | 3          | 1          | 0          | 1          | 14          |              |
| <b>Maret</b>       | 6          | 1          | 1          | 0          | 0          | 1         | 2          | 2          | 1          | 0          | 0          | 1          | 15          |              |
| <b>Bakla</b>       | 2          | 0          | 0          | 1          | 0          | 1         | 4          | 5          | 1          | 0          | 3          | 0          | 17          |              |
| <b>Hday</b>        | 5          | 2          | 0          | 0          | 0          | 0         | 12         | 14         | 7          | 2          | 2          | 4          | 48          |              |
| <b>Laba</b>        | 1          | 1          | 0          | 0          | 0          | 0         | 2          | 6          | 1          | 1          | 0          | 0          | 12          |              |
| <b>Digdig</b>      | 0          | 0          | 0          | 0          | 0          | 0         | 6          | 2          | 1          | 0          | 0          | 0          | 9           |              |
| <b>Total</b>       | <b>223</b> | <b>22</b>  | <b>44</b>  | <b>29</b>  | <b>36</b>  | <b>23</b> | <b>278</b> | <b>142</b> | <b>80</b>  | <b>71</b>  | <b>87</b>  | <b>52</b>  | <b>1087</b> |              |

|               | Jan | Feb | Mar | Apr | May | Jun | July | Aug | Sep | Oct | Nov | Dec | Total |                               |
|---------------|-----|-----|-----|-----|-----|-----|------|-----|-----|-----|-----|-----|-------|-------------------------------|
| <b>2016</b>   |     |     |     |     |     |     |      |     |     |     |     |     |       |                               |
| Male          | 0   | 0   | 0   | 0   | 0   | 0   | 0    | 35  | 74  | 24  | 92  | 65  | 290   |                               |
|               | 0   | 0   | 0   | 0   | 0   | 0   | 0    | 71  | 127 | 66  | 147 | 130 | 541   |                               |
| Female        | 0   | 0   | 0   | 0   | 0   | 0   | 0    | 28  | 37  | 11  | 78  | 45  | 199   | <b>TTotal=</b><br><b>1003</b> |
|               | 0   | 0   | 0   | 0   | 0   | 0   | 0    | 65  | 86  | 54  | 140 | 117 | 462   |                               |
| <b>Total</b>  | 0   | 0   | 0   | 0   | 0   | 0   | 0    | 63  | 111 | 35  | 170 | 110 | 489   |                               |
| <b>TTotal</b> |     |     |     |     |     |     |      | 136 | 213 | 120 | 287 | 247 | 1003  |                               |
| P.f           | 0   | 0   | 0   | 0   | 0   | 0   | 0    | 28  | 34  | 4   | 13  | 25  | 104   | <b>Total=</b><br><b>501</b>   |
| P.v           | 0   | 0   | 0   | 0   | 0   | 0   | 0    | 35  | 79  | 31  | 158 | 85  | 388   |                               |
| Mixed         |     |     |     |     |     |     |      |     | 2   |     | 1   |     | 3     |                               |
| <b>Total</b>  |     |     |     |     |     |     |      | 63  | 115 | 35  | 172 | 110 | 495   |                               |
| <5            | 0   | 0   | 0   | 0   | 0   | 0   | 0    | 5   | 16  | 3   | 15  | 16  | 55    |                               |
|               | 0   | 0   | 0   | 0   | 0   | 0   | 0    | 16  | 30  | 13  | 27  | 41  | 127   | <b>TTotal</b>                 |
| 6-15          | 0   | 0   | 0   | 0   | 0   | 0   | 0    | 18  | 35  | 6   | 20  | 24  | 103   | <b>1003</b>                   |
|               | 0   | 0   | 0   | 0   | 0   | 0   | 0    | 36  | 56  | 27  | 60  | 59  | 238   |                               |
| >15           | 0   | 0   | 0   | 0   | 0   | 0   | 0    | 40  | 60  | 26  | 135 | 70  | 331   |                               |
|               | 0   | 0   | 0   | 0   | 0   | 0   | 0    | 84  | 127 | 80  | 200 | 147 | 638   |                               |
| <b>Total</b>  | 0   | 0   | 0   | 0   | 0   | 0   | 0    | 63  | 111 | 35  | 170 | 110 | 489   |                               |
| <b>TTotal</b> | 0   | 0   | 0   | 0   | 0   | 0   | 0    | 136 | 213 | 120 | 287 | 247 | 1003  |                               |
| <b>01</b>     | 0   | 0   | 0   | 0   | 0   | 0   | 0    | 17  | 54  | 17  | 114 | 64  | 266   |                               |
| <b>02</b>     | 0   | 0   | 0   | 0   | 0   | 0   | 0    | 14  | 52  | 15  | 39  | 21  | 141   |                               |
| <b>Meo</b>    | 0   | 0   | 0   | 0   | 0   | 0   | 0    |     | 1   | 1   | 13  | 10  | 25    |                               |
| <b>Apollo</b> | 0   | 0   | 0   | 0   | 0   | 0   | 0    |     | 1   | 1   | 0   | 2   | 4     |                               |
| <b>Beyan</b>  | 0   | 0   | 0   | 0   | 0   | 0   | 0    | 5   | 1   | 1   | 0   | 6   | 12    | <b>Total</b>                  |
| <b>Dket</b>   | 0   | 0   | 0   | 0   | 0   | 0   | 0    | 17  | 1   |     |     | 4   | 22    | <b>489</b>                    |
| <b>Agrae</b>  | 0   | 0   | 0   | 0   | 0   | 0   | 0    |     | 1   |     |     |     | 1     |                               |
| <b>Rora</b>   | 0   | 0   | 0   | 0   | 0   | 0   | 0    |     |     |     | 1   |     | 2     |                               |
| <b>Adobha</b> | 0   | 0   | 0   | 0   | 0   | 0   | 0    |     |     |     | 1   |     | 1     |                               |
| <b>Maret</b>  | 0   | 0   | 0   | 0   | 0   | 0   | 0    |     |     |     | 2   |     | 2     |                               |
| <b>Hday</b>   | 0   | 0   | 0   | 0   | 0   | 0   | 0    | 10  |     |     |     | 3   | 13    |                               |
| <b>Total</b>  |     |     |     |     |     |     |      | 63  | 111 | 35  | 170 | 110 | 489   |                               |
